# Supplementary material for: Solvent-free fabrication of paper based all-carbon disposable multifunctional sensors and passive electronic circuits
Source: Royal Society of Chemistry journal article supplement (doi:10.1039/c6ra21457f), 2016-01-01
Supplement: c6ra21457f1.pdf [file c6ra21457f1.pdf]

## **Supplementary Information**

### **Solvent-free fabrication of paper based all-carbon disposable multifunctional sensors and passive electronic circuits**

Srinivasulu Kanaparthi and Sushmee Badhulika\*

*<sup>1</sup>Department of Electrical Engineering, Indian Institute of Technology Hyderabad, Kandi, 502285, India.*

\*Corresponding Author: Email: sbadh@iith.ac.in

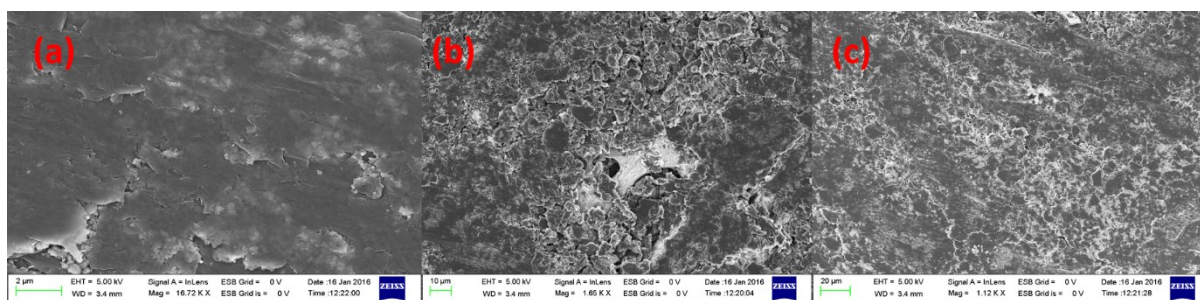

Figure S1: SEM images of graphite on paper (GoP) at different magnification levels

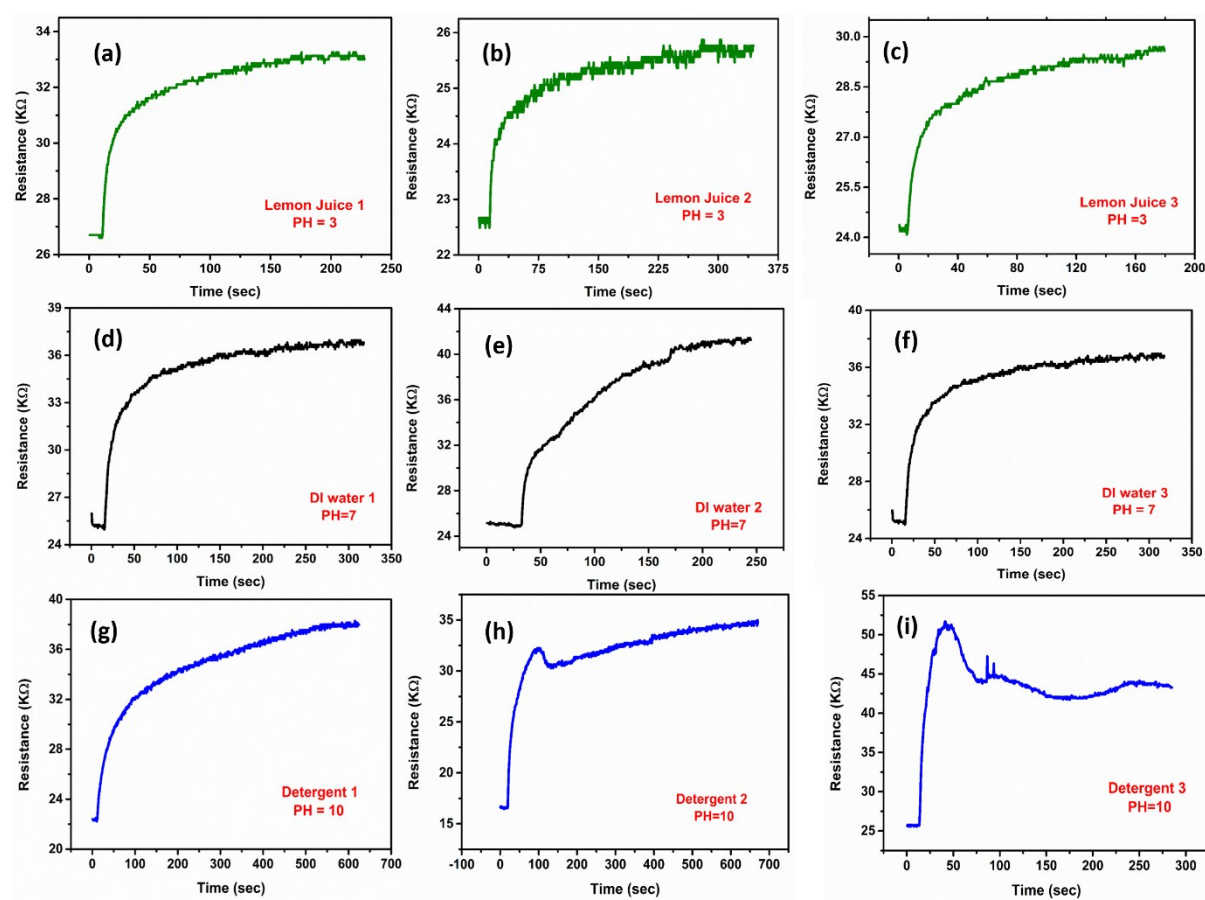

Figure S2: Response of PH sensor to (a),(b),(c) lemon juice (PH=3.5); (d),(e),(f) DI water (PH=7) and (f),(g),(h) detergent (PH=10).

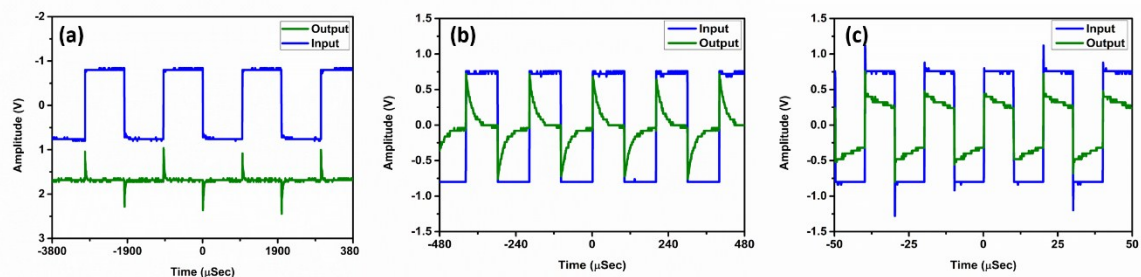

Figure S3: High pass filter (Integrator) input (blue) and output (green) at (c) 500 Hz, (d) 5 kHz and (e) 50 kHz

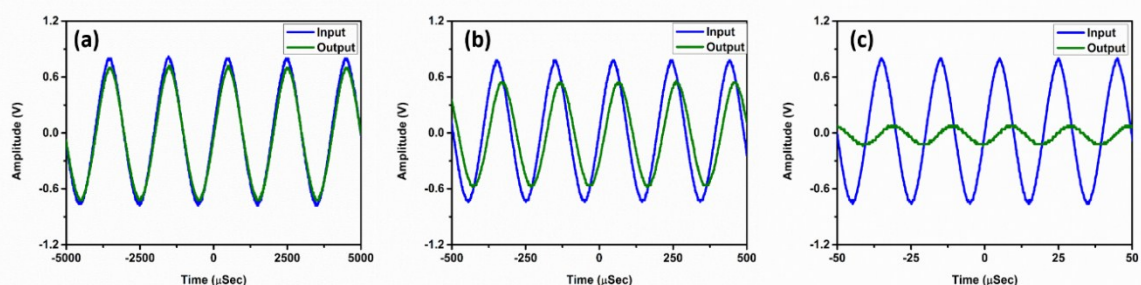

Figure S4: Frequency response of low pass filter to sinusoidal input at frequency (a) 500 Hz, (b) 5 kHz and (c) 50 kHz

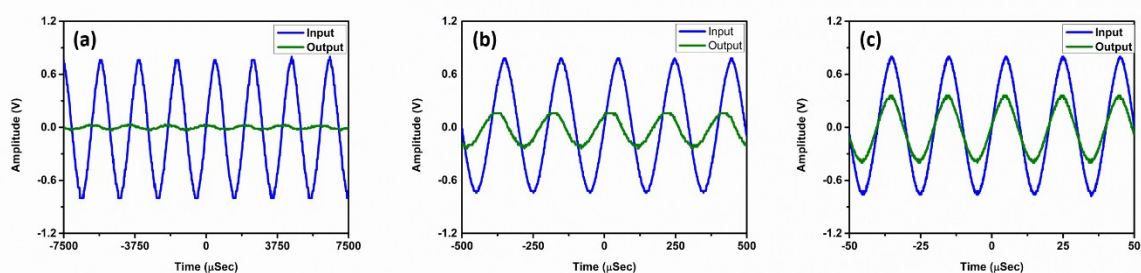

Figure S5: Frequency response of high pass filter to sinusoidal input at frequency (a) 500 Hz, (b) 5 kHz and (c) 50 kHz
